# Supplementary material for: Development of a rational framework for the therapeutic efficacy of fecal microbiota transplantation for calf diarrhea treatment
Source: Springer Nature journal article supplement (doi:10.1186/s40168-021-01217-4), 2022-02-21

| No | Dietary enteritis |   | Weak calf syndrome |   |
|----|-------------------|---|--------------------|---|
|    | 0                 | 7 | 0                  | 7 |
| 1  | +                 | - | -                  | - |
| 2  | -                 | - | -                  | - |
| 3  | -                 | - | -                  | - |
| 4  | -                 | - | -                  | - |
| 5  | +                 | - | -                  | - |
| 6  | -                 | - | -                  | - |
| 7  | -                 | - | -                  | - |
| 8  | -                 | - | -                  | - |
| 9  | +                 | - | -                  | - |
| 10 | -                 | - | -                  | - |
| 11 | -                 | - | -                  | - |
| 12 | -                 | - | -                  | - |
| 13 | -                 | - | -                  | - |
| 14 | +                 | - | -                  | - |

**Successful**

| No | Dietary enteritis |   | Weak calf syndrome |   |
|----|-------------------|---|--------------------|---|
|    | 0                 | 7 | 0                  | 7 |
| 15 | +                 | - | +                  | - |
| 16 | -                 | - | -                  | - |
| 17 | -                 | - | -                  | - |
| 18 | -                 | + | -                  | + |
| 19 | -                 | - | X                  | X |
| 20 | -                 | - | X                  | X |

**Unsuccessful**

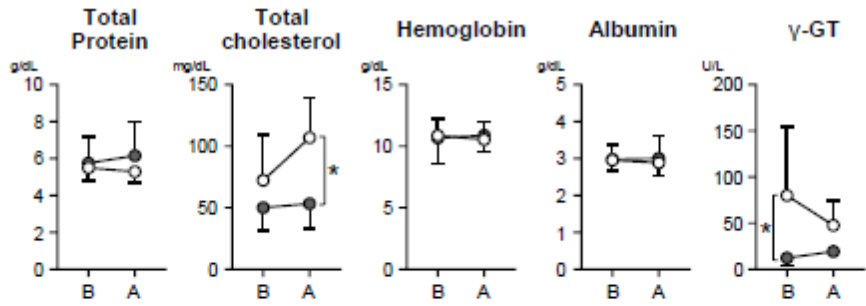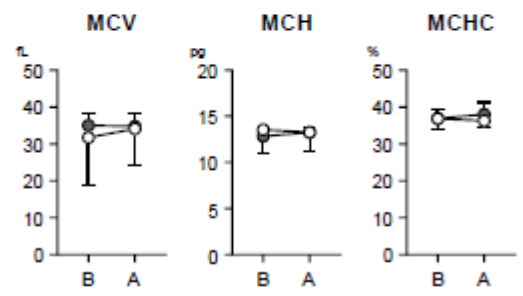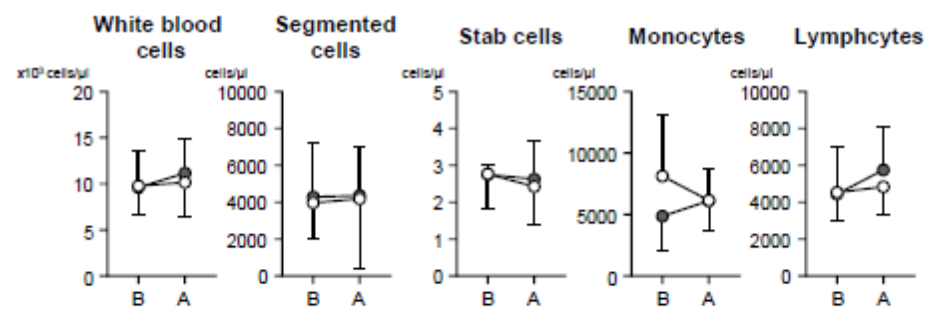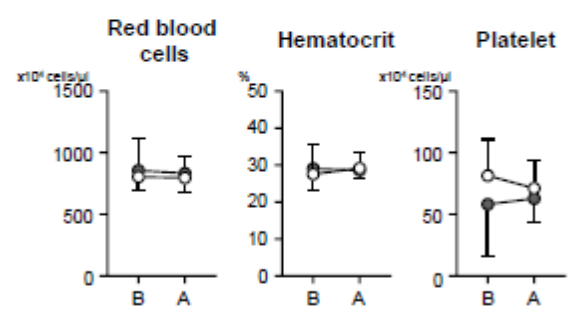

B: Before FMT  
A: 7 days after FMT

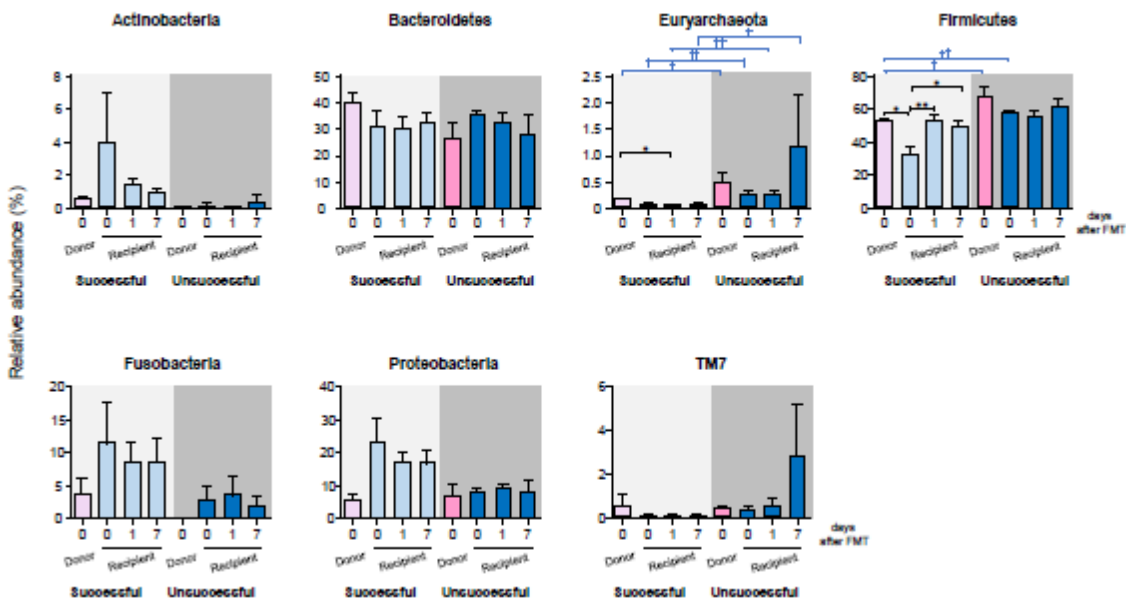

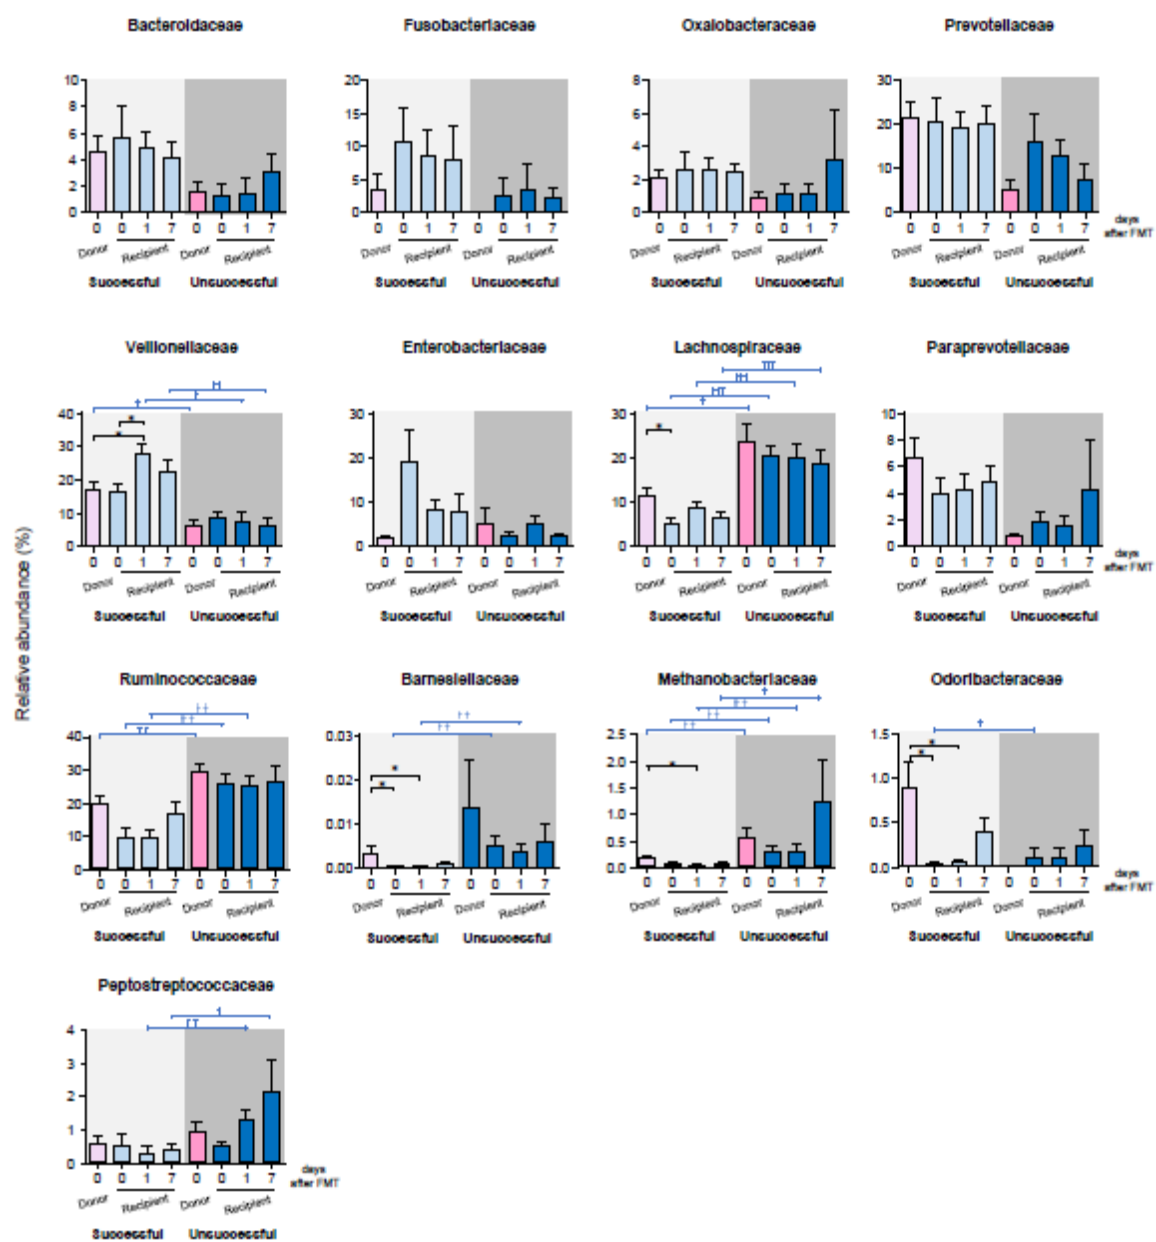



Figure S6

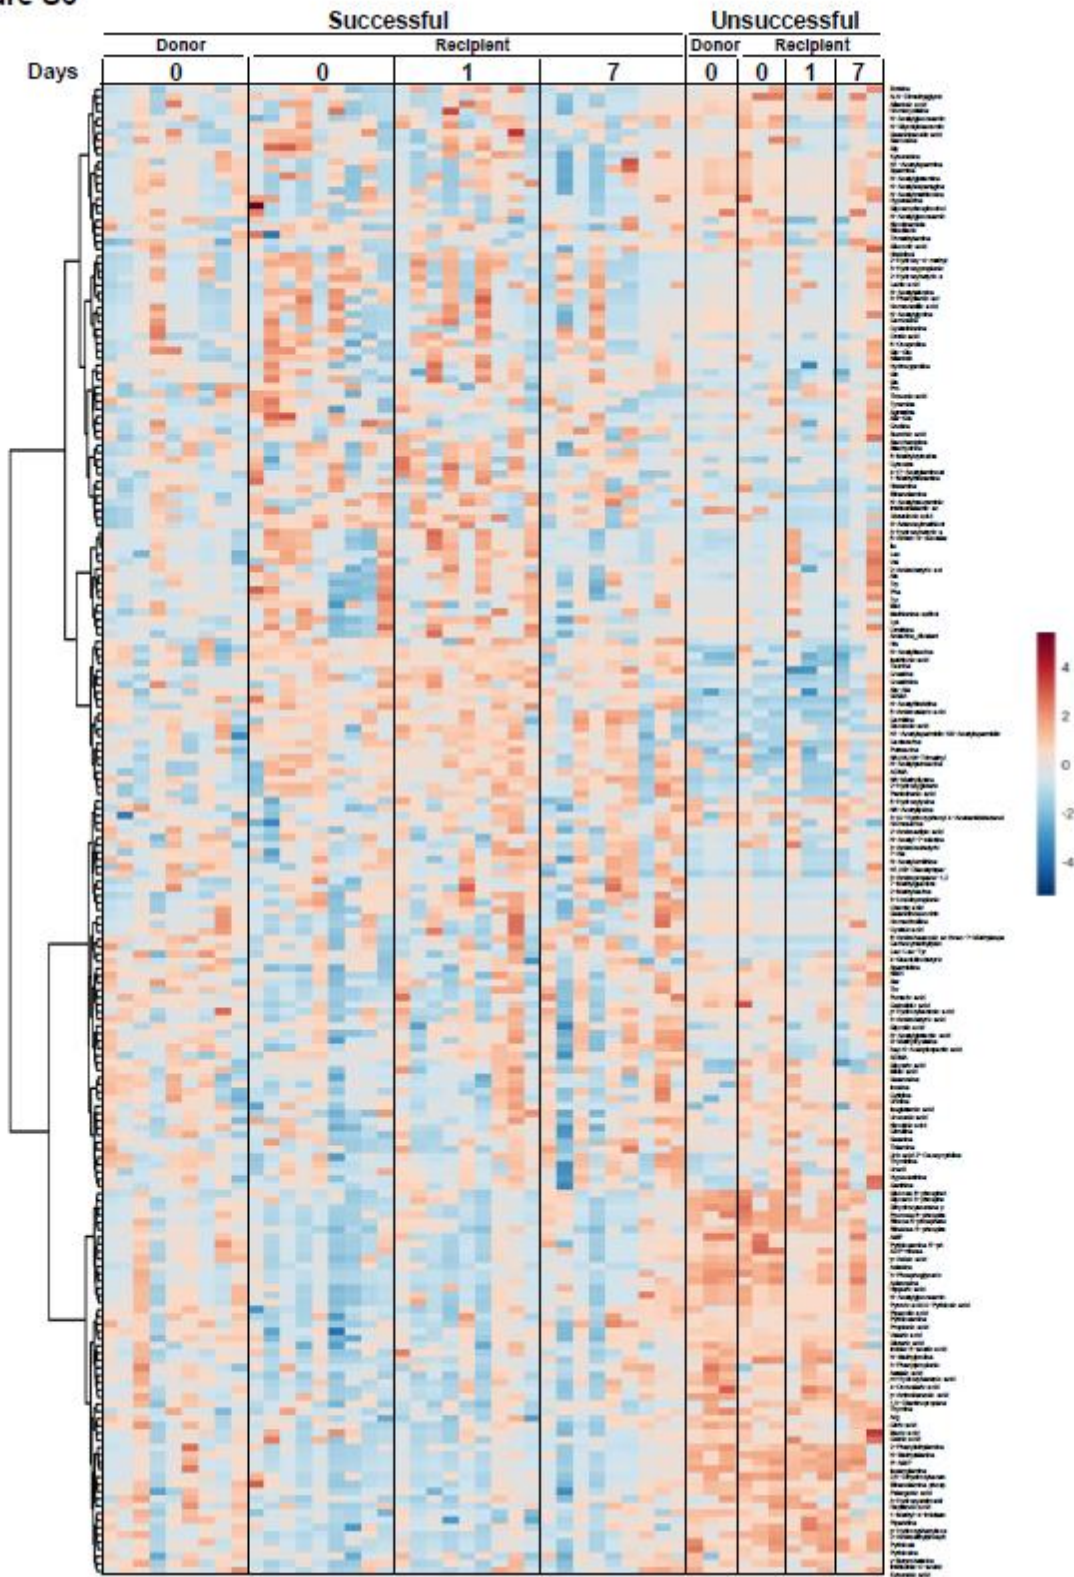

**A**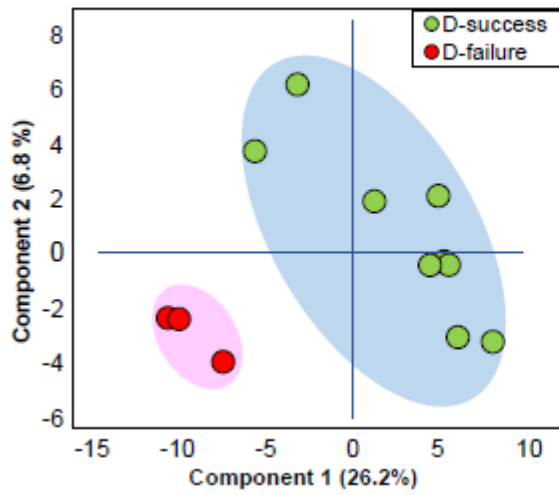**B**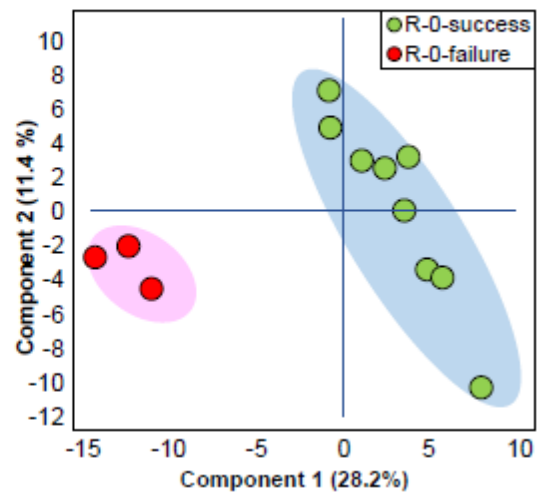**C**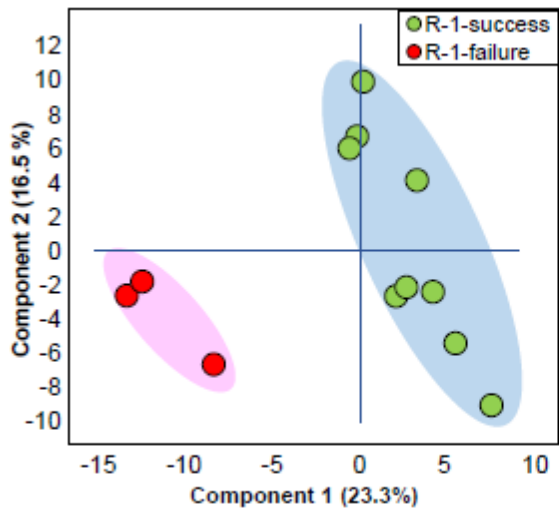**D**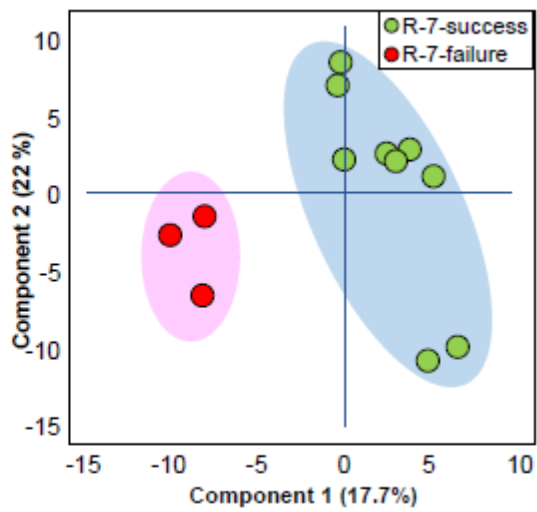

Figure 30

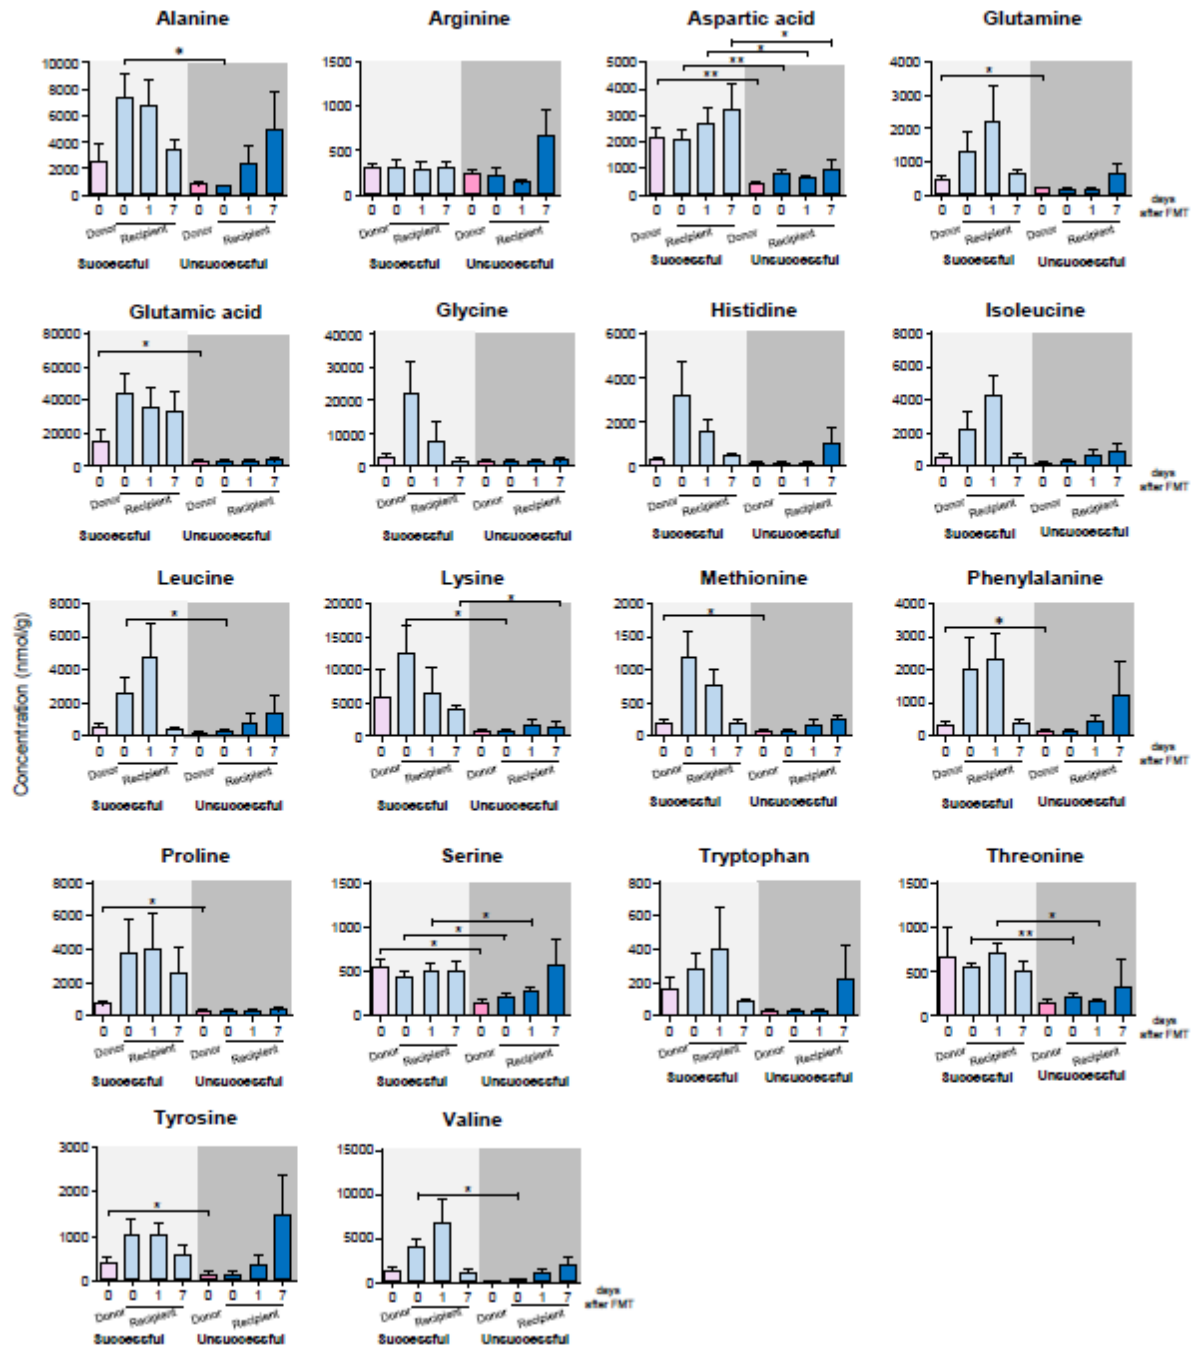



Figure S9

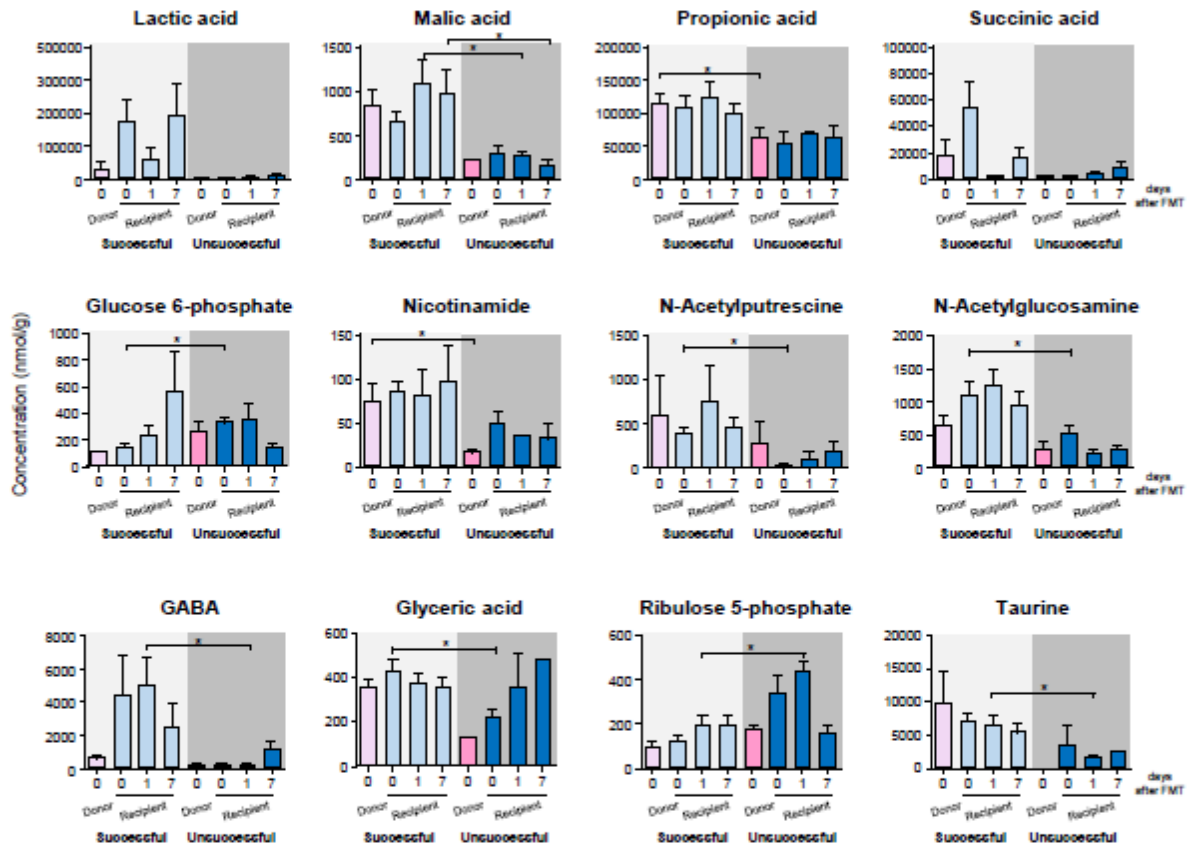

Figure S10

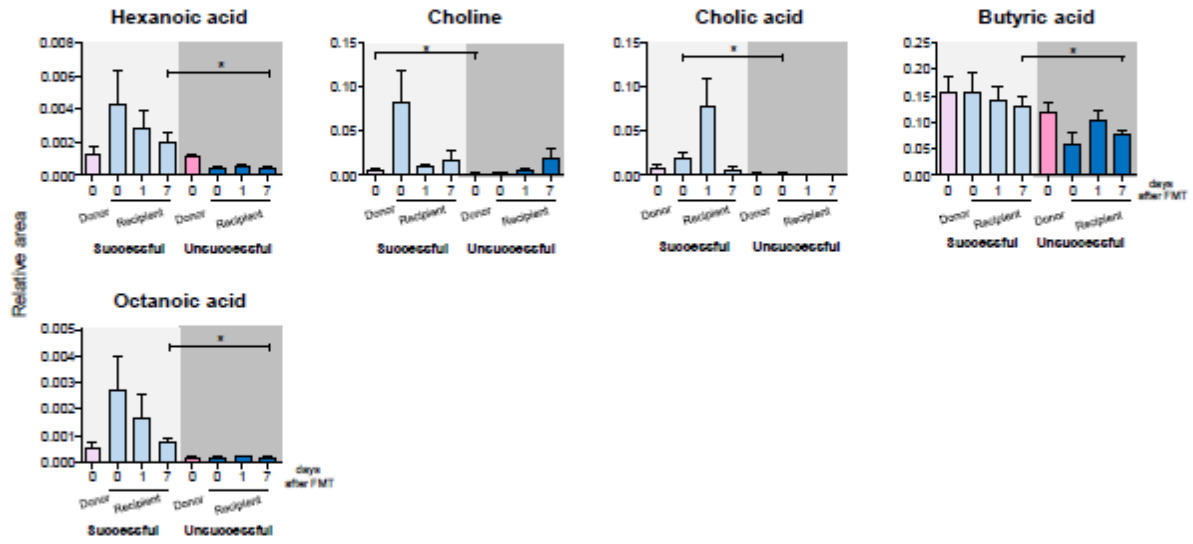

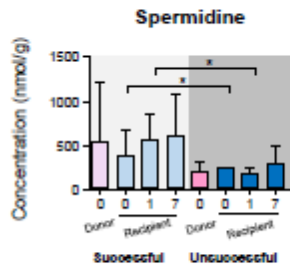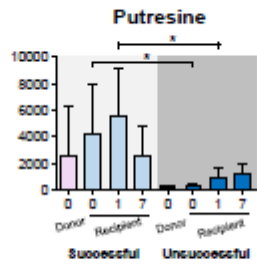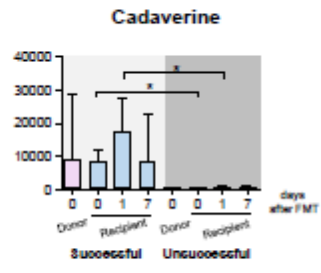

Figure S12

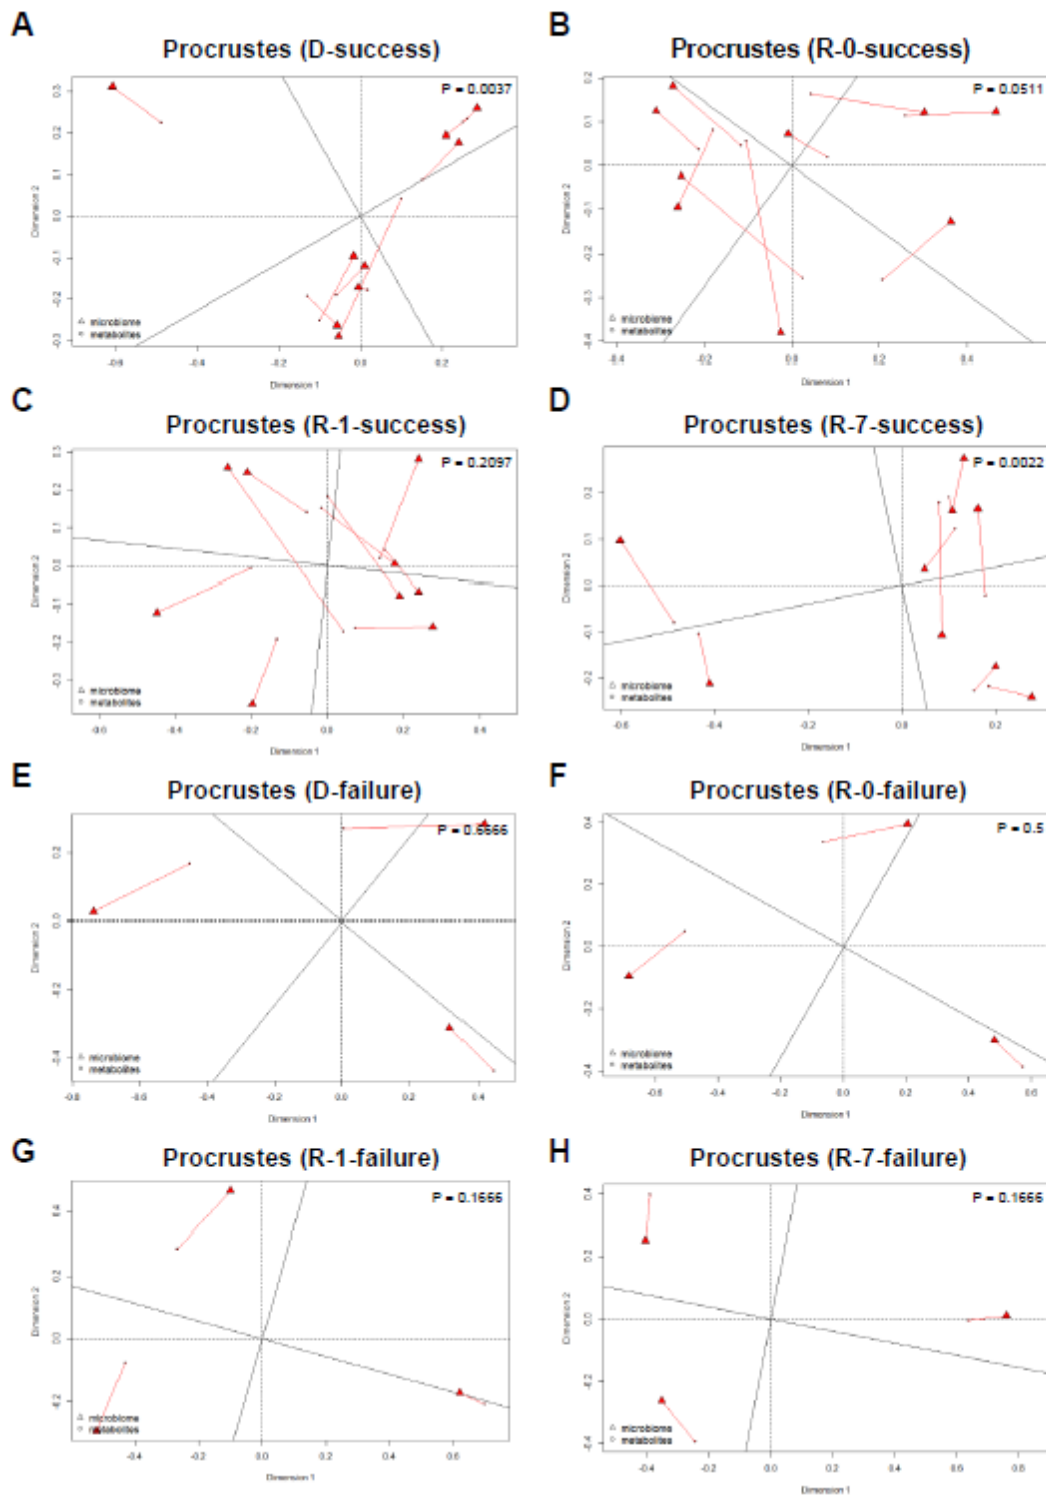

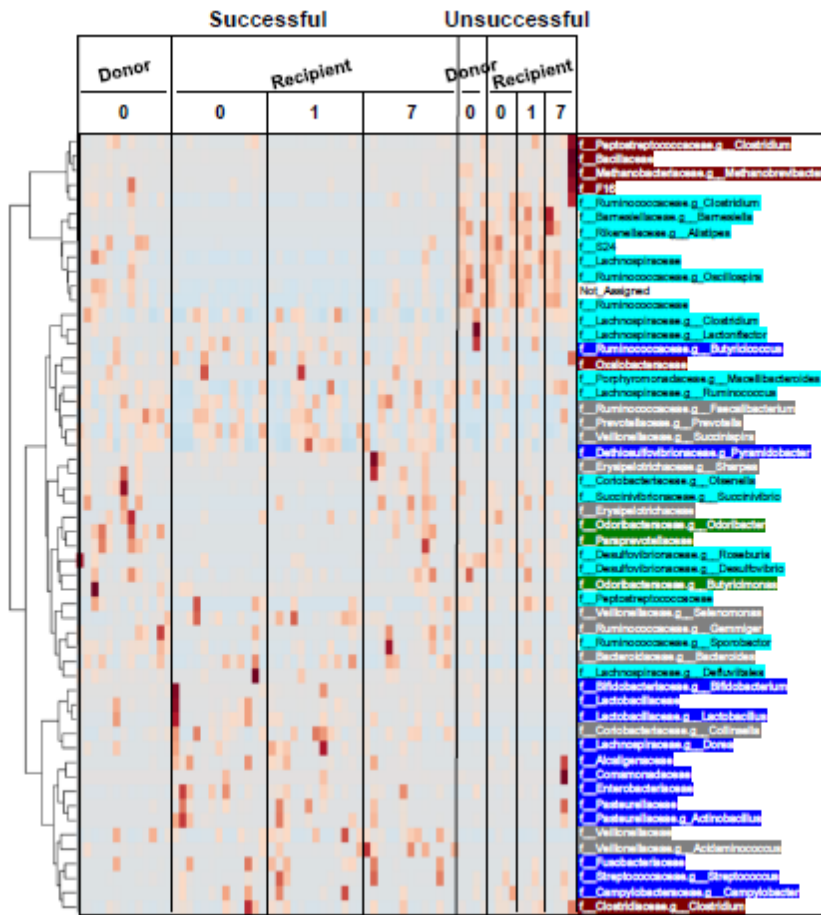



Figure S15

A

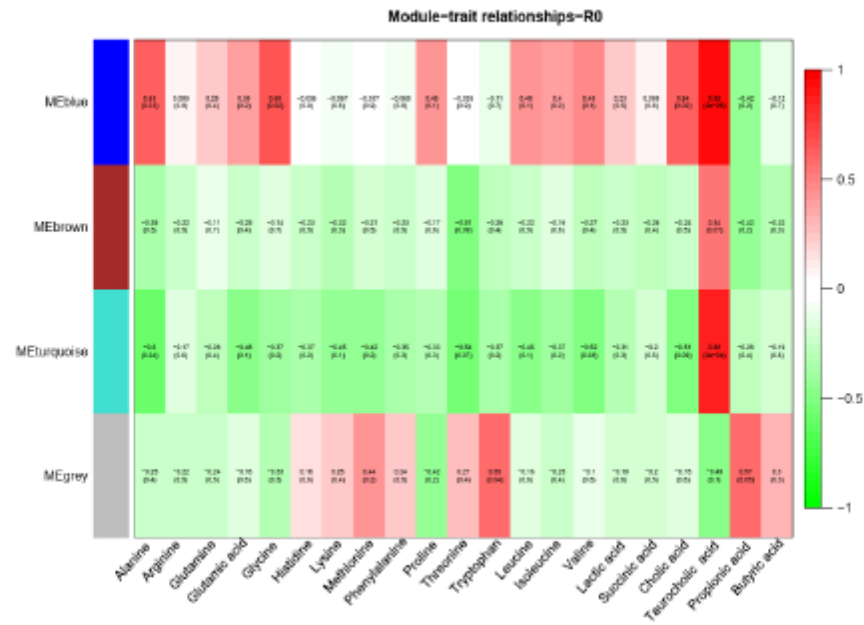

B

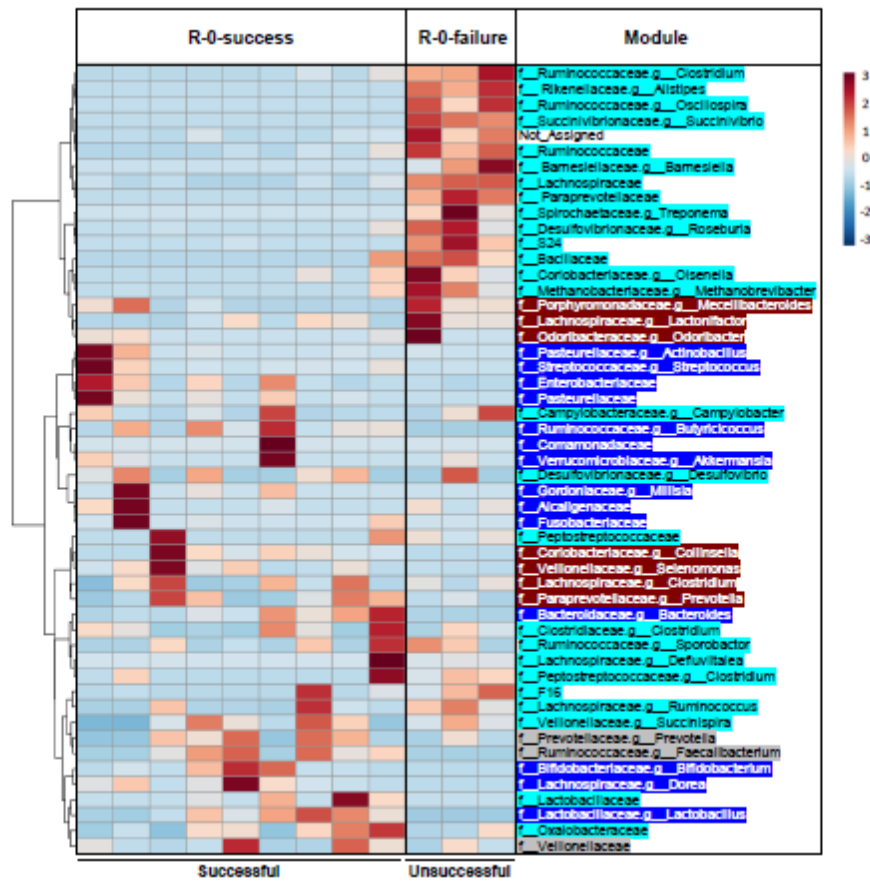

Figure S16

A

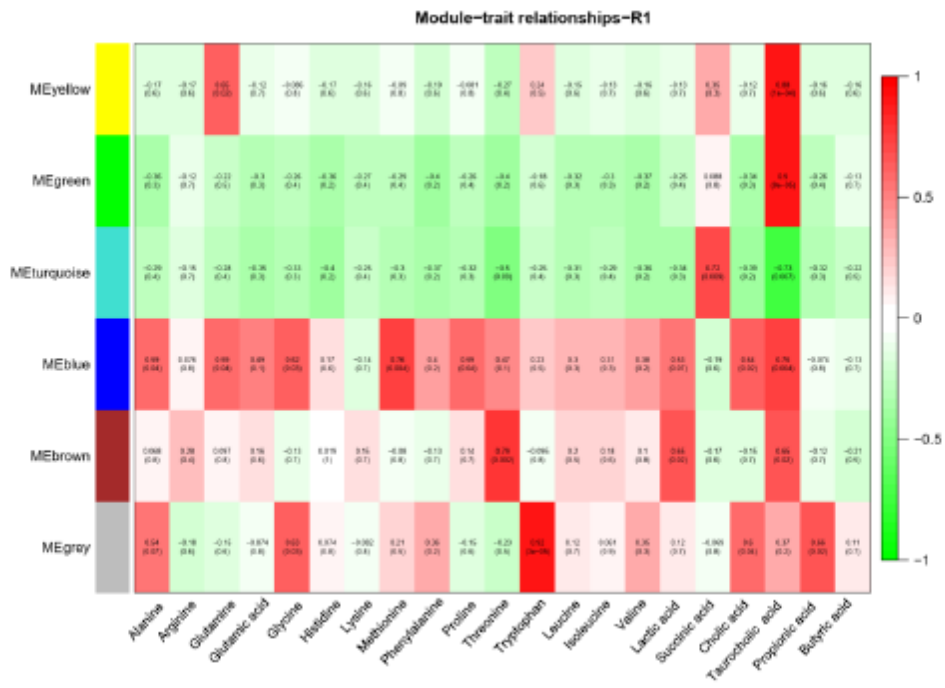

B

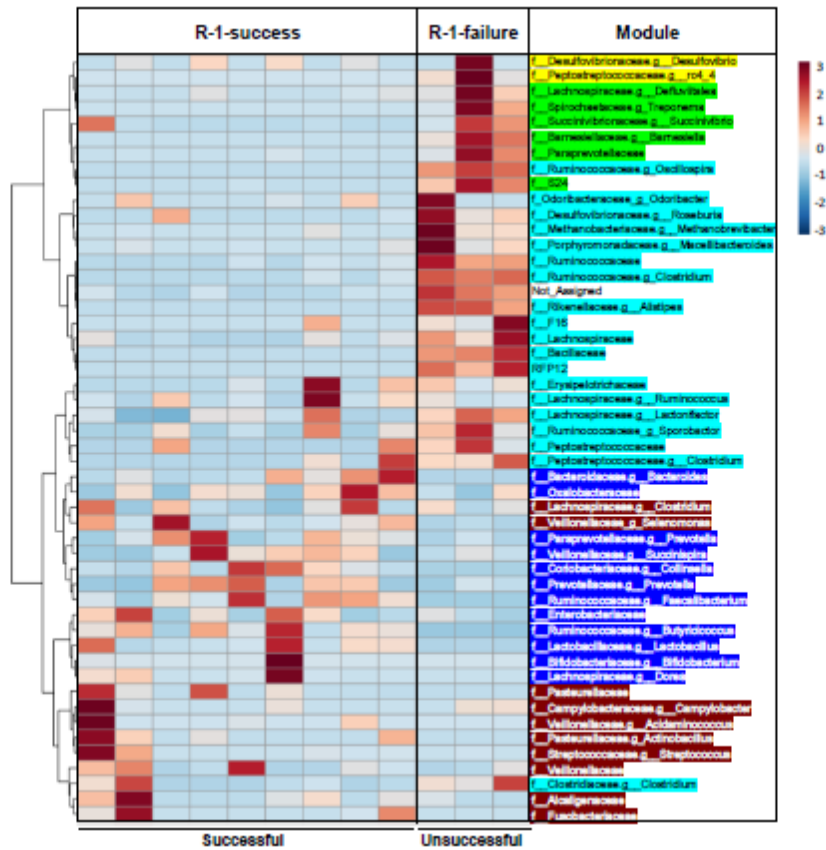





**A**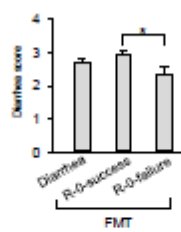**B**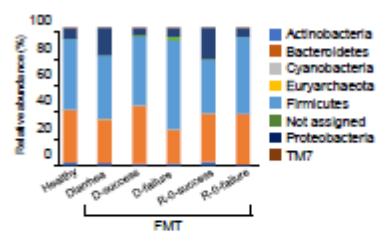**C**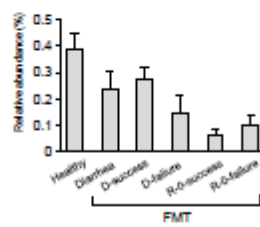**D**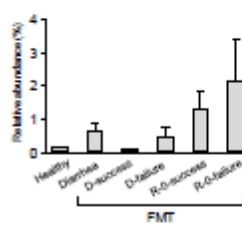

Supplement: 40168_2021_1217_MOESM5_ESM.pdf [file 40168_2021_1217_MOESM5_ESM.pdf]
